# Supplementary material for: A survey on biometric cryptosystems and cancelable biometrics
Source: Springer Nature journal article supplement (doi:10.1186/1687-417x-2011-3), 2011-09-23
Supplement: 13635_2011_6_MOESM3_ESM.pdf [file 13635_2011_6_MOESM3_ESM.pdf]

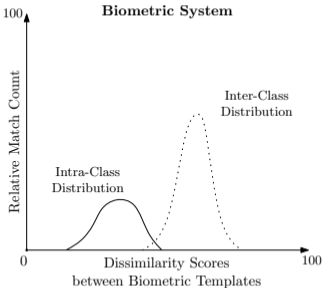

(a)

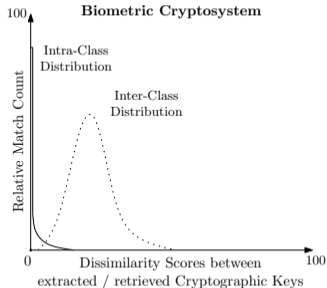

(b)
