# Supplementary material for: A survey on biometric cryptosystems and cancelable biometrics
Source: Springer Nature journal article supplement (doi:10.1186/1687-417x-2011-3), 2011-09-23

Biometric Cryptosystem/  
Cancelable Biometric System

Helper Data/  
Transformed Templates

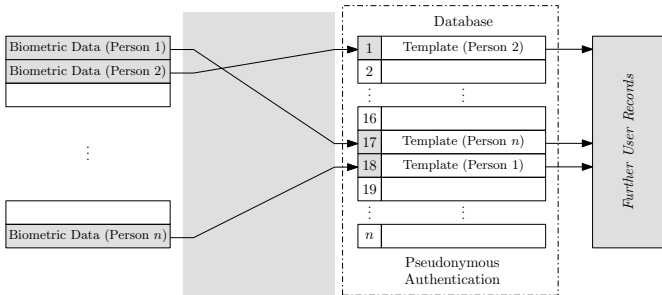

Supplement: 13635_2011_6_MOESM17_ESM.pdf [file 13635_2011_6_MOESM17_ESM.pdf]
